# Supplementary material for: A Classification Study of Respiratory Syncytial Virus (RSV) Inhibitors by Variable Selection with Random Forest
Source: Int J Mol Sci. 2011 Feb 21;12(2):1259–80. doi: 10.3390/ijms12021259 (PMC3083704; doi:10.3390/ijms12021259)
Supplement: Supplementary file 1 [file ijms-12-01259-s001.doc]

**Table S1.** Compounds with their chemical names, activities and classes used in the dataset.

| No. | Substituent | pEC50 | Classb | Ref.a |
| --- | --- | --- | --- | --- |
| 1 | H | 4.507 | L | 12 |
| 2 | CH2CH2NEt2 | 6.328 | L | 12 |
| 3 | CH2CH2N*i*Pr2 | 5.174 | L | 12 |
| 4* | CH2CH2N(*c*CH2)4 | 6.222 | L | 12 |
| 5 | CH2CH2N(*c*CH2)5 | 5.959 | L | 12 |
| 6 | CH2CH2N(*c*CH2)6 | 5.553 | L | 12 |
| 7 | CH2CH2CH2NMe2 | 5.959 | L | 12 |
| 8* | CHMe2 | 4.81 | L | 12 |
| 9 | CH2CH=CMe2 | 5.481 | L | 12 |
| 10 | CH2CH2OH | 5.114 | L | 12 |
| 11 | CH2CH2CN | 5.57 | L | 12 |
| 12* | CH2CH2C(O)CH3 | 6.284 | L | 12 |
| 13* | CH2CH2SOCH3 | 6.367 | L | 12 |
| 14 | CH2CH2CO2*t*Bu | 5.366 | L | 12 |
| 15 | CH2CH2CO2H | 4.742 | L | 12 |
| 16* | CH2CH2CONH2 | 5.678 | L | 12 |
| 17 | CH2Ph | 4.979 | L | 12 |
| 18* | CH2CH2Ph | 6.114 | L | 12 |
| 19* | CH2C(O)Ph | 5.658 | L | 12 |
| 20 | CH2CH(OH)Ph | 6.229 | L | 12 |

| No. | Substituent | pEC50 | Classb | Ref.a |
| --- | --- | --- | --- | --- |
| 21 | CH2CH2N(*c*CH2)4 | 6.377 | L | 12 |
| 22 | CH2CH2N(*c*CH2)5 | 5.585 | L | 12 |
| 23 | CH2CH2N(*c*CH2)6 | 5.959 | L | 12 |
| 24 | CH2CH2CH2NMe2 | 5.444 | L | 12 |
| 25 | CH(CH3)2 | 4.288 | L | 12 |
| 26* | CH2CH(CH3)2 | 4.323 | L | 12 |
| 27 | CH2CH2CH(CH3)2 | 6.357 | L | 12 |

| No. | Substituetnt | pEC50 | Classb | Ref.a |
| --- | --- | --- | --- | --- |
| 28 | CH2CH2NH2 | 5.481 | L | 12 |

**Table S1.** *Cont.*

| No. | R1 | R2 | pEC50 | Classb | Ref.a |
| --- | --- | --- | --- | --- | --- |
| 29 | H | *iso*-Propenyl | 6.125 | L | 13 |
| 30 | CH2CH2CH(CH3)2 | *iso*-Propenyl | 8.398 | H | 13 |
| 31 | CH2CH2CH(CH3)2 | CH2CH3 | 7.959 | H | 13 |
| 32* | CH2CH2CH(CH3)2 | Allyl | 7.796 | H | 13 |
| 33* | CH2CH2CH(CH3)2 | CH2CN | 7.553 | H | 13 |
| 34 | CH2CH2CH(CH3)2 | (CH2)5CN | 7.602 | H | 13 |
| 35 | CH2CH2CH(CH3)2 | CH2-4-C6H4-OH | 7.745 | H | 13 |
| 36 | CH2CH2CH(CH3)2 | CH2-4-C6H4-CN | 7.921 | H | 13 |
| 37 | CH2CH2CH(CH3)2 | CH2-4-C6H4-CON(CH3)2 | 7.678 | H | 13 |
| 38 | CH2CH2CH(CH3)2 | CH2-4-C6H4-SO2CH3 | 8.046 | H | 13 |
| 39* | (CH2)3OH | Et | 8 | H | 13 |
| 40 | (CH2)4OH | *iso*-Propenyl | 8.398 | H | 13 |
| 41 | (CH2)4OH | *i*Pr | 7.959 | H | 13 |
| 42* | (CH2)4OH | Et | 7.854 | H | 13 |
| 43 | (CH2)2CN | *iso*-Propenyl | 7.824 | H | 13 |
| 44 | (CH2)2CN | *i*Pr | 8.097 | H | 13 |
| 45 | (CH2)2CN | Ph | 8.301 | H | 13 |
| 46* | (CH2)4CN | *iso*-Propenyl | 7.569 | H | 13 |
| 47* | (CH2)5CN | *iso*-Propenyl | 7.886 | H | 13 |
| 48 | (CH2)3SO2CH3 | *iso*-Propenyl | 7.523 | H | 13 |
| 49 | (CH2)3SO2CH3 | H | 5.827 | L | 13 |
| 50 | CH2CH2CH(CH3)2 | SO2CH3 | 8.155 | H | 13 |
| 51* |  | CH2-4-C6H4-OH | 8.398 | H | 13 |
| 52 | CH2CH2CH(CH3)2 | CH2-3,5-di-I-4-C6H2-OH | 6.164 | L | 13 |
| 53 | CH2CH2CH(CH3)2 | CH2-4-C6H4-SO2N(CH3)2 | 8.398 | H | 13 |
| 54 | (CH2)6CN | *iso*-Propenyl | 8.222 | H | 13 |
| 55 | (CH2)6CN | *i*Pr | 8.301 | H | 13 |
| 56* | (CH2)3CN | (CH2)4CN | 7.602 | H | 13 |
| 57 | CH2CH2CH(CH3)2 | CH2CH2CO2H | 7.824 | H | 14 |
| 58 | CH2CH2CH(CH3)2 | (CH2)4CO2H | 8.097 | H | 14 |
| 59 | CH2CH2CH(CH3)2 | (CH2)5CO2H | 7.824 | H | 14 |
| 60 | CH2CH2CH(CH3)2 | CH2CONHSO2CH3 | 6.213 | L | 14 |
| 61 | CH2CH2CH(CH3)2 | CH2CONHSO2Ph | 5.916 | L | 14 |

**Table S1.** *Cont.*

| No. | R1 | R2 | pEC50 | Classb | Ref.a |
| --- | --- | --- | --- | --- | --- |
| 62 | CH2CH2CH(CH3)2 | CH2-4-C6H4-CO2H | 7.959 | H | 14 |
| 63 | CH2CH2CH(CH3)2 | CH2-3-C6H4-CO2H | 8 | H | 14 |
| 64 | CH2CH2CH(CH3)2 | CH2-2-C6H4-CO2H | 7.959 | H | 14 |
| 65 |  | *iso*-Propyl | 7.678 | H | 14 |
| 66 |  | CH2-4-C6H4-CO2H | 7.854 | H | 14 |
| 67* |  | CH2-2-C6H4-SO3H | 7.886 | H | 14 |
| 68* | (CH2)3OH | CH2CO2H | 5.714 | L | 14 |
| 69 | CH2CH2N(CH3)2 | *iso*-Proenyl | 7.959 | H | 14 |
| 70 | CH2CH2N(CH3)2 | *iso*-Propyl | 7.854 | H | 14 |
| 71* | (CH2)3N(CH3)2 | H | 5.779 | L | 14 |
| 72* | CH2CH2N(CH3)2 | CH2-4-C6H4-CO2CH3 | 7.638 | H | 14 |
| 73 | CH2CH2N(CH3)2 | CH2-2-C6H4-CO2CH3 | 7.721 | H | 14 |
| 74 | CH2CH2N(CH3)2 | CH2CH2N(CH3)2 | 6.398 | L | 14 |
| 75 | CH2CH2CH(CH3)2 | CH2-3,5-C6H3-(CO2H)2 | 6.183 | L | 14 |
| 76* | CH2CH2CH(CH3)2 | CH2-4-C6H4-P(O)(OH)2 | 7.569 | H | 14 |
| 77 | CH2CH2CH(CH3)2 | CH2-2-C6H4-SO3H | 8.155 | H | 14 |
| 78 | CH2CH2CH(CH3)2 |  | 8.301 | H | 14 |
| 79 | CH2CH2CH(CH3)2 |  | 8.222 | H | 14 |
| 80 | CH2CH2CH(CH3)2 |  | 8.523 | H | 14 |
| 81 | CH2CH2CH(CH3)2 |  | 8.097 | H | 14 |
| 82* |  | H | 5.922 | L | 14 |
| 83 |  | CH2-3-C6H4-CO2H | 8.155 | H | 14 |
| 84 |  | CH2-4-C6H4-P(O)(OH)2 | 6.434 | L | 14 |
| 85* | (CH2)4OH | CH2-4-C6H4-CO2H | 8.398 | H | 14 |

**Table S1.** *Cont.*

| No. | R2 | pEC50 | Classb | Ref.a |
| --- | --- | --- | --- | --- |
| 86 | H | 5.243 | L | 15 |
| 87 | CH2-4-C6H4CN | 6.206 | L | 15 |

| No. | R1 | R2 | pEC50 | Classb | Ref.a |
| --- | --- | --- | --- | --- | --- |
| 88* | (CH2)3CN | CH2-*c*Pr | 8.523 | H | 15 |
| 89* | (CH2)3C(Me)2OH | *c*Pr | 7.87 | H | 15 |
| 90 | (CH2)3CF3 | *c*Pr | 8.222 | H | 15 |
| 91 | (CH2)4F | *c*Pr | 8 | H | 15 |
| 92 | (CH2)4F | CH2CF3 | 7.824 | H | 15 |

| No. | R2 | pEC50 | Classb | Ref.a |
| --- | --- | --- | --- | --- |
| 93* |  | 8.523 | H | 15 |

| No. | R1 | R2 | pEC50 | Classb | Ref.a |
| --- | --- | --- | --- | --- | --- |
| 94 | (CH2)3CN | *i*Pr | 8.398 | H | 15 |
| 95 | (CH2)3CN | *t*Bu | 8.523 | H | 15 |
| 96 | (CH2)3CN | *c*Bu | 7.796 | H | 15 |
| 97 | (CH2)3CN | CH2CF3 | 7.824 | H | 15 |

**Table S1.** *Cont.*

| No. | R1 | R2 | pEC50 | Classb | Ref.a |
| --- | --- | --- | --- | --- | --- |
| 98 | (CH2)5OH | *c*Pr | 7.886 | H | 15 |
| 99* | (CH2)4OH | *c*Bu | 8.155 | H | 15 |
| 100 | (CH2)4OH | *c*C5H9 | 8.097 | H | 15 |
| 101 | (CH2)3SO2CH3 | *c*Bu | 7.678 | H | 15 |
| 102 | (CH2)3SO2CH3 | CH2CF3 | 7.824 | H | 15 |
| 103 | (CH2)3SO2C2H5 | *c*Pr | 8.222 | H | 15 |
| 104* | (CH2)3SO2C2H5 | CH2CF3 | 7.959 | H | 15 |
| 105* | (CH2)3SO2*c*Pr | *c*Pr | 7.77 | H | 15 |
| 106 | (CH2)3CN | CHF2 | 7.959 | H | 15 |
| 107* | (CH2)3SO2C2H5 | CHF2 | 7.959 | H | 15 |

| No. | R1 | R2 | pEC50 | Classb | Ref.a |
| --- | --- | --- | --- | --- | --- |
| 108 | 4-CH2NH2 | *i*Pr | 6.146 | L | 16 |
| 109 | 4-CH2OH | *i*Pr | 6.086 | L | 16 |
| 110 | 4-CH2OCH3 | *i*Pr | 5.125 | L | 16 |
| 111 | 4-CO2CH3 | *i*Pr | 3.638 | L | 16 |
| 112 | 4-CH2CN | *i*Pr | 3.618 | L | 16 |
| 113* | 4-CH2CH2CN | *i*Pr | 3.631 | L | 16 |
| 114 | 4-CH2CH2CH2CN | *i*Pr | 3.672 | L | 16 |
| 115 | 5-Br | *i*Pr | 7.745 | H | 16 |
| 116 | 5-CN | *i*Pr | 6.322 | L | 16 |
| 117 | 5-CN | CH2CO2*t*Bu | 5.593 | L | 16 |
| 118 | 5-CH2=CH | *i*Pr | 6.201 | L | 16 |
| 119* | 5-CH3CH2 | *i*Pr | 6.16 | L | 16 |
| 120* |  | *i*Pr | 4.666 | L | 16 |
| 121 |  | Me | 3.622 | L | 16 |

**Table S1.** *Cont.*

| No. | R1 | R2 | pEC50 | Classb | Ref.a |
| --- | --- | --- | --- | --- | --- |
| 122 | 5-CO2H | Isopropenyl | 3.578 | L | 16 |
| 123 | 5-CO2H | *i*Pr | 3.623 | L | 16 |
| 124* |  | *i*Pr | 3.648 | L | 16 |
| 125 | 5-CO2Me | *i*Pr | 3.638 | L | 16 |
| 126 | 5-C(O)N(CH3)2 | *i*Pr | 4.606 | L | 16 |
| 127 | 5-CH2NH2 | *i*Pr | 8.699 | H | 16 |
| 128 | 5-CH2CH2NH2 | *i*Pr | 5.364 | L | 16 |
| 129 | 5-CH2N(CH3)2 | *i*Pr | 3.738 | L | 16 |
| 130 | 5-CH2NHC(O)CH3 | *i*Pr | 6.2 | L | 16 |
| 131* | 5-CH2NHS(O)2Me | *i*Pr | 6.14 | L | 16 |
| 132 | 5-C(CH3)NH2 | *i*Pr | 6.159 | L | 16 |
| 133 | 5-C(NH)NH2 | Isopropenyl | 8.398 | H | 16 |
| 134 | 5-C(NH)NH2 | CH2CO2*t*Bu | 8.046 | H | 16 |
| 135 | 5-C(NH)NH2 | CH2CO2H | 7.509 | H | 16 |
| 136 | 5-C(NOH)NH2 | Isopropenyl | 8.301 | H | 16 |
| 137 | 5-C(NOH)NH2 | CH2CO2*t*Bu | 7.796 | H | 16 |
| 138 | 6-CH2NHCH3 | *i*Pr | 3.728 | L | 16 |
| 139 | 6-CH2N(CH3)2 | *i*Pr | 3.74 | L | 16 |
| 140* | 6-CH2CH2NH2 | *i*Pr | 5.148 | L | 16 |
| 141 | 6-CO2H | *i*Pr | 3.623 | L | 16 |
| 142* | 6-C(O)NH2 | *i*Pr | 3.91 | L | 16 |
| 143 | 7-CH2NH2 | *i*Pr | 3.717 | L | 16 |
| 144* | 7-CO2CH3 | *i*Pr | 3.638 | L | 16 |
| 145* | 7-CH2OH | *i*Pr | 3.609 | L | 16 |

| No. | R | R1 | X | Y | pEC50 | Classb | Ref.a |
| --- | --- | --- | --- | --- | --- | --- | --- |
| 146 | H | (CH2)2CH(CH3)2 | CHCH2CO2H | - | 6.152 | L | 17 |
| 147 | H | (CH2)2CH(CH3)2 | CHCH2CONHCH2CH2Ph | - | 6.421 | L | 17 |
| 148* | H | (CH2)4F | CH | CH | 5.637 | L | 17 |

**Table S1.** *Cont.*

| No. | R | R1 | X | Y | pEC50 | Classb | Ref.a |
| --- | --- | --- | --- | --- | --- | --- | --- |
| 149 | H | (CH2)4F | CEt | CH | 6.045 | L | 17 |
| 150 | NH2CH2 | (CH2)4F | CH | C(OCH3) | 8.046 | H | 17 |
| 151 | NH2CH2 | (CH2)4OH | CH | C(OCH3) | 8.097 | H | 17 |
| 152 | H | (CH2)4F | C(Br) | CH | 6.103 | L | 17 |
| 153 | H | (CH2)4CN | CH2 | CH2 | 5.956 | L | 17 |
| 154* | H | (CH2)2N(CH3)2 | CH2 | CH2 | 6.341 | L | 17 |
| 155* | NH2CH2 | (CH2)4F | NCH2CF3 | C=O | 8.097 | H | 17 |
| 156 | NH2CH2 | (CH2)4OH | NCH2CF3 | C=O | 8.097 | H | 17 |
| 157 | H | (CH2)2CH(CH3)2 | NCH2CO2Et | C=O | 5.732 | L | 17 |
| 158 | H | (CH2)2CH(CH3)2 | NCH2-4-C6H4CO2H | C=O | 8.046 | H | 17 |
| 159 | H | (CH2)2N(CH3)2 | NCH2-4-C6H4CO2Me | C=O | 6.379 | L | 17 |
| 160 | H | (CH2)4F | C(CH3)2 | SO2 | 5.115 | L | 17 |
| 161 | H | (CH2)4OH | NCH3 | SO2 | 7.721 | H | 17 |
| 162 | H | (CH2)3SO2CH3 | NCH3 | SO2 | 5.242 | L | 17 |
| 163 | H | (CH2)3CN | O | - | 5.6 | L | 17 |
| 164* | H | (CH2)3CN | C(CH3)2 | - | 7.721 | H | 17 |
| 165* | H | (CH2)4F | C(OH) | C(CO2H) | 4.586 | L | 17 |
| 166 | H | (CH2)4F | C(OH) | CH | <3.563 | L | 17 |
| 167 | NH2CH2 | (CH2)3SO2CH3 | NCH2CF3 | C=O | 7.678 | H | 17 |
| 168 | NH2CH2 | (CH2)3SO2CH3 | NCH2CO2H | C=O | 5.993 | L | 17 |
| 169* | H | (CH2)4CN | CH2 | SO2 | 5.873 | L | 17 |
| 170 | H | (CH2)4F | CH2 | S | 5.991 | L | 17 |
| 171 | H | (CH2)4F | C(CH3)2 | S | <3.599 | L | 17 |
| 172 | NH2CH2 | (CH2)2CH(CH3)2 | N*c*C3H5 | C=O | 7.959 | H | 17 |
| 173* | CH3NHCH2 | (CH2)2CH(CH3)2 | N*c*C3H5 | C=O | 6.103 | L | 17 |
| 174 | *n*C4H9NHCH2 | (CH2)2CH(CH3)2 | N*c*C3H5 | C=O | <3.719 | L | 17 |
| 175 | CO2CH3 | (CH2)2CH(CH3)2 | N*c*C3H5 | C=O | <3.663 | L | 17 |
| 176 | CO2H | (CH2)2CH(CH3)2 | N*c*C3H5 | C=O | <4.163 | L | 17 |
| 177 | NH2CH2 | (CH2)4F | N*c*C3H5 | C=O | 8.046 | H | 17 |
| 178 | H | (CH2)4OH | N*c*C3H5 | C=O | 7.602 | H | 17 |
| 179* | NH2CH2 | (CH2)4OH | N*c*C3H5 | C=O | 7.745 | H | 17 |
| 180 | H | (CH2)4F | N*c*C3H5 | SO2 | 6.365 | L | 17 |
| 181 | NH2CH2 | (CH2)2CH(CH3)2 | N*c*C3H5 | SO2 | 8.523 | H | 17 |

**Table S1.** *Cont.*

| No. | Side chain (SC) | R1 | pEC50 | Classb | Ref.a |
| --- | --- | --- | --- | --- | --- |
| 182 | -(CH2)2CH(Me)2 | H | 8 | H | 18 |
| 183 | -(CH2)4OH | Me | 8 | H | 18 |
| 184* | -(CH2)4OAc | Me | 7.523 | H | 18 |
| 185 | -(CH2)3OMe | Me | 7.523 | H | 18 |
| 186 | -(CH2)3OMe | -CH2CH3 | 5.562 | L | 18 |
| 187 | -(CH2)4OH | *t*Bu | 5.947 | L | 18 |
| 188 | -(CH2)3OMe | -CH(CH2CH3)2 | 6.029 | L | 18 |
| 189* | -(CH2)3OMe | -Cyclo-hexyl | 6.186 | L | 18 |
| 190 | -(CH2)3OMe | -(CH2)2*c*Hex | 6.416 | L | 18 |
| 191 | -(CH2)3OMe | -CH2CH=CH2 | 6.369 | L | 18 |
| 192* | -(CH2)3OMe | -CH2CONEt2 | 7.585 | H | 18 |
| 193 | -(CH2)3OMe | -(CH2)2NMe2 | 6.432 | L | 18 |
| 194 | -(CH2)3OMe | -(CH2)2piperidine | 6.166 | L | 18 |
| 195 | -(CH2)3OMe | -CH(CO2H)CH2CO2H | 7.721 | H | 18 |
| 196 | -(CH2)2CHMe2 | Ph | 6.426 | L | 18 |
| 197 | -(CH2)2CHMe2 | 4’-Ph-Br | 6.152 | L | 18 |
| 198 | -(CH2)2CHMe2 | -CH2-Ph-4-CO2H | 7.796 | H | 18 |
| 199 | -(CH2)2NMe2 | -CH2-4’-Ph-CO2H | 7.783 | H | 18 |
| 200 | -(CH2)2CHMe2 | -CH2-4’-Ph-CO2Me | 7.638 | H | 18 |
| 201 | -(CH2)2NMe2 | -CH2-4’-Ph-CO2Me | 7.638 | H | 18 |
| 202* | -(CH2)3OMe | -CH2-4’-Ph-CONMe2 | 7.523 | H | 18 |
| 203 | -(CH2)3CHMe2 | -CH2-4’-Ph-CONMe2 | 8.046 | H | 18 |
| 204 | -(CH2)4OH | -CH2-4’-Ph-SO2Me | 7.921 | H | 18 |
| 205 | -(CH2)OAc | -CH2-4’-Ph-SO2Me | 8.301 | H | 18 |

| No. | Aza position | SC | R1 | pEC50 | Classb | Ref.a |
| --- | --- | --- | --- | --- | --- | --- |
| 206 | 6 | -(CH2)4-F | -H | 7.747 | H | 18 |
| 207 | 7 | -(CH2)3-CN | -H | 7.644 | H | 18 |
| 208 | 6 | -(CH2)4OH | -CH3 | 7.51 | H | 18 |
| 209* | 7 | -(CH2)4OH | -CH3 | 7.506 | H | 18 |
| 210 | 6 | -(CH2)3SO2Me | -CH2CH2F | 7.903 | H | 18 |

**Table S1.** *Cont.*

| No. | Aza position | SC | R1 | pEC50 | Classb | Ref.a |
| --- | --- | --- | --- | --- | --- | --- |
| 211* | 7 | -(CH2)3-SO2Me | -CH2CH2F | 7.535 | H | 18 |
| 212 | 6 | -(CH2)3SO2Me | -CH2CH=CH2 | 7.907 | H | 18 |
| 213 | 6 | -(CH2)3SO2Me | -CH2-2-pyridine | 7.538 | H | 18 |
| 214 | 7 | -(CH2)4OH | -CH2-4’-Ph-SO2CH3 | 8.137 | H | 18 |
| 215 | 5 | -(CH2)3SO2Me | -CH2-4’-Ph-SO2CH3 | 4.975 | L | 18 |
| 216 | 5 | -(CH2)3CN | -CH2-4’-Ph-SO2CH3 | 4.992 | L | 18 |

*, test set; a, from the corresponding reference;

b, H denotes high active compounds, L denotes low active compounds.
